# Supplementary material
Source: PubMed Central journal article supplement (PMC10205852)
Supplement: 134_2023_7065_MOESM2_ESM.pdf [file 134_2023_7065_MOESM2_ESM.pdf]

**ADJUDICATION RESPIRATORY INFECTION WORKSHEET**

Site name: **Nantes HD** Patient number: **P-01-013** Date of inclusion: **09/08/2021**

Major diagnosis leading to hospital admission: **1**

Main Diagnosis at ICU admission: **1**

Did any hospital-acquired pneumonia OR tracheobronchitis occur during ICU stay? **YES**  
 If yes, date of the first episode (consider the respiratory sample): **11/08/2021**  
 If yes, total number of pneumonia or tracheo during the hospitalization (including recurrence and relapse): **1**

**First episode of respiratory tract infection (pneumonia or tracheobronchitis):**

Highest temperature within 24h **before** diagnosis: **37.1** °C  
 Hypothermia within 24h before the first diagnosis? **YES**  
 Highest hyperleukocytosis within 24h before the first diagnosis: **8** G/L  
 Leukopenia within 24h before the first diagnosis? **NO**  
 Increase FiO2 >10% within 24h before the first diagnosis? **YES**  
 Lowest PaO2/FiO2 within 24h before the first diagnosis: **207** mmHg  
 New infiltrates on chest X ray within 24h before the first diagnosis? **YES**  
 If yes, please specify: **1**  
 Need to increase sedation within 24h before the first diagnosis? **NO**

Highest temperature within 24h **after** the first diagnosis: **37.8** °C  
 Hypothermia within 24h after the first diagnosis? **NO**  
 Highest hyperleukocytosis within 24h after the first diagnosis: **8** G/L  
 Leukopenia within 24h after the first diagnosis? **NO**  
 C reactive protein: **D** mg/L  
 Procalcitonin: **D** µg/L  
 Increase FiO2 >10% within 24h after the first diagnosis? **NO**  
 Lowest PaO2/FiO2 within 24h after the first diagnosis: **110** mmHg  
 Need to increase sedation within 24h after the first diagnosis? **NO**  
 Number of bacteria taxa involved in the first episode: **3 species**  
 If yes, precise specie 1: **METI-R STAPH. AUR.** If yes, precise specie 2: **KLEBSIELLA PNEUMONAE**  
 If yes, precise specie 3: **ESCHERICHIA COLI**

Pathogenic virus? **NO** If yes, precise:

Tracheal secretions: **0**

Modified CPIS (clinical pulmonary infection score): **4**

Appropriate empiric antibiotic therapy (before identification of pathogens) meaning that all bacteria are susceptible to the antibiotic used: **YES**

Adaptation of antibiotic therapy after identification? **Increase the spectrum**

**ARDS complicating the diagnosis? YES**

If yes, date: **11/08/2021** If yes, lowest PaO2/FiO2: **110** mmHg  
 If yes, total number of such complication: **1**

**Pleurisy complicating the diagnosis? NO**

If yes, date: If yes, total number of such complication:

**Bacteriemia complicating the diagnosis? NO**

If yes, date:  
 If yes, total number of such complication:

**Second episode of respiratory tract infection (pneumonia OR tracheobronchitis): NO**

Highest temperature within 24h **before** diagnosis: °C  
 Hypothermia?  
 Highest hyperleukocytosis within 24h before the diagnosis: G/L  
 Leukopenia?  
 Increase FiO2 >10% within 24h before the diagnosis?  
 Lowest PaO2/FiO2 within 24h before diagnosis: mmHg  
 Need to increase sedation within 24h before the diagnosis?  
 Highest temperature within 24h **after** the diagnosis: °C  
 Hypothermia?  
 Highest hyperleukocytosis within 24h after the diagnosis: G/L  
 Leukopenia?  
 Increase FiO2 >10% within 24h after the diagnosis?  
 Lowest PaO2/FiO2 within 24h after the diagnosis: mmHg  
 Need to increase sedation within 24h after the diagnosis?

**Concomitant medications:**

| Category                     | Molecule           | Start date | End date   |
|------------------------------|--------------------|------------|------------|
| Antibiotics                  | AMOXICILLINE       | 15/08/2021 | 12/08/2021 |
| Neuromuscular blocking agent | ATRACURIUM         | 11/08/2021 | 12/08/2021 |
| Neuromuscular blocking agent | CISATRACURIUM      | 12/08/2021 | 12/08/2021 |
| Antibiotics                  | ACIDE CLAVULANIQUE | 12/08/2021 | 12/08/2021 |
| Antibiotics                  | CEFEPIME           | 12/08/2021 | 15/10/2021 |
| Antibiotics                  | LEVOFLOXACINE      | 12/08/2021 | 14/08/2021 |

**Final Review – First episode:**  HAP  VAP  V-HAP  Tracheobronchitis  No respiratory infection

**Final Review – Second episode:**  HAP  VAP  V-HAP  Tracheobronchitis  No respiratory infection

**Date:** **Name/Signature:**
